# Supplementary material for: Assessment of the recovery and photosynthetic efficiency of Breviolum psygmophilum and Effrenium voratum (Symbiodiniaceae) following cryopreservation
Source: PeerJ journal article supplement (doi:10.7717/peerj.14885), 2023-02-28
Supplement: Figure_S1.pdf [file Figure_S1.pdf]

# A summary of rapid freezing technique

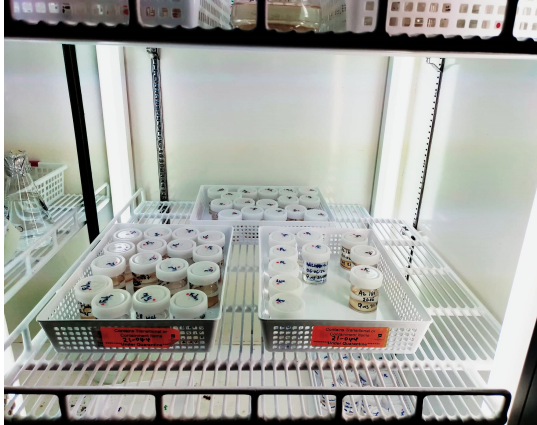

**1.** Symbiodiniaceae cultures were grown up to the late exponential phase

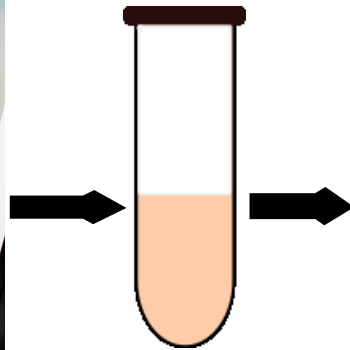

**2.** Cultures treated with DMSO and incubated for 30 min

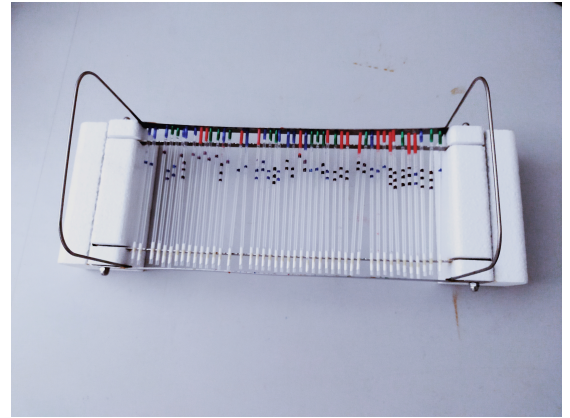

**3.** Treated cultures were transferred into cryopreservation straws and laid onto a metal rack fitted with polystyrene floats

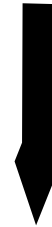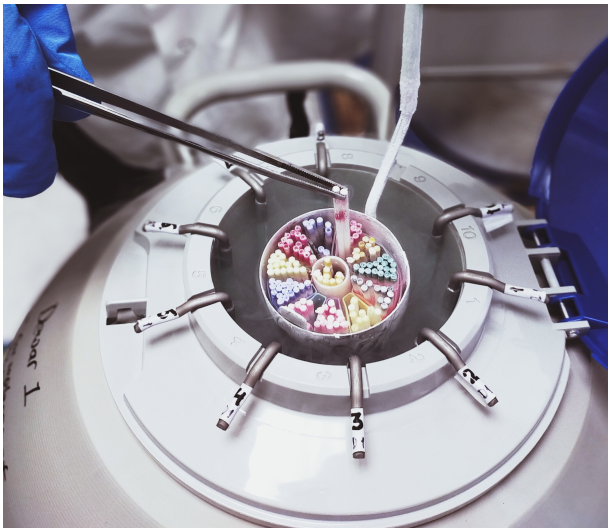

**5.** All the straws were transferred into a storage dewar with liquid nitrogen

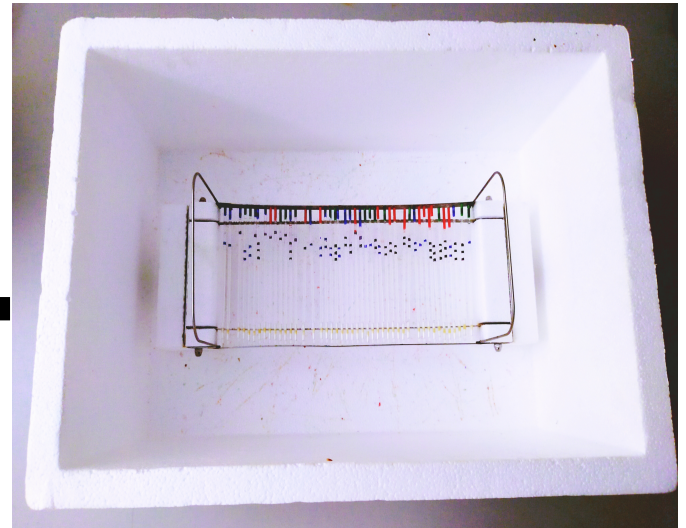

**4.** The metal rack with cryopreservation straws was placed over a liquid nitrogen bath to induce rapid freezing
