# Supplementary material for: Assessment of the recovery and photosynthetic efficiency of Breviolum psygmophilum and Effrenium voratum (Symbiodiniaceae) following cryopreservation
Source: PeerJ journal article supplement (doi:10.7717/peerj.14885), 2023-02-28

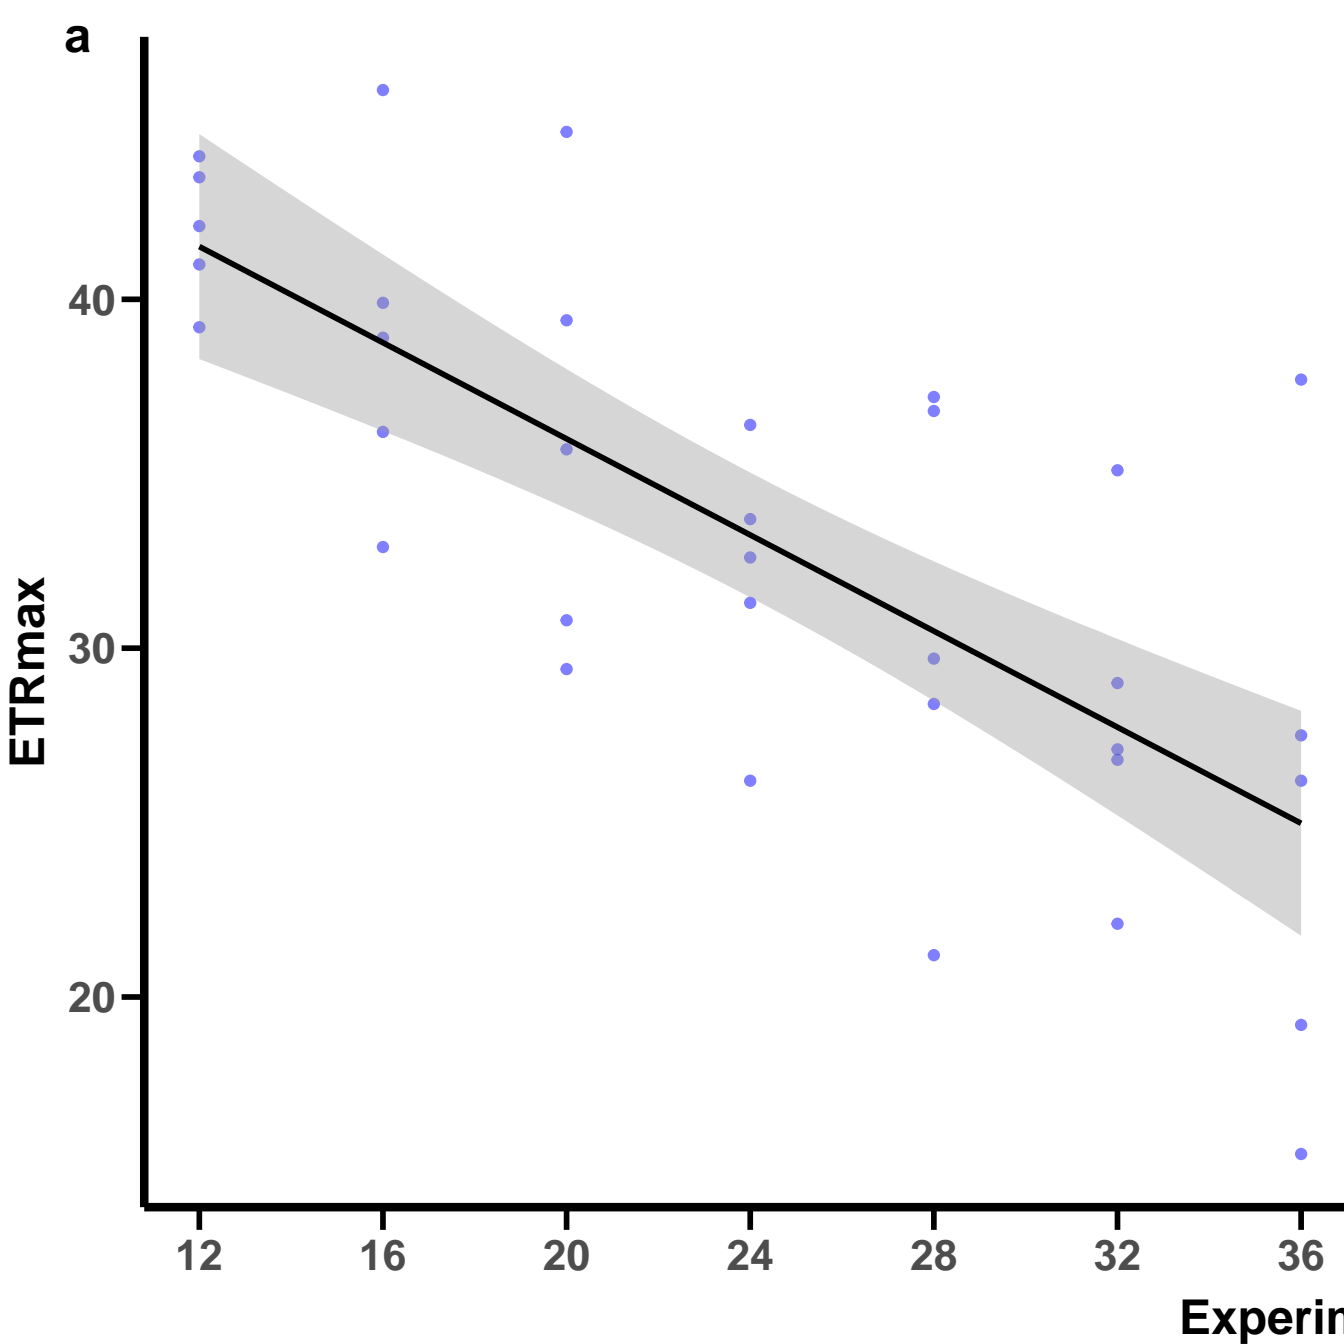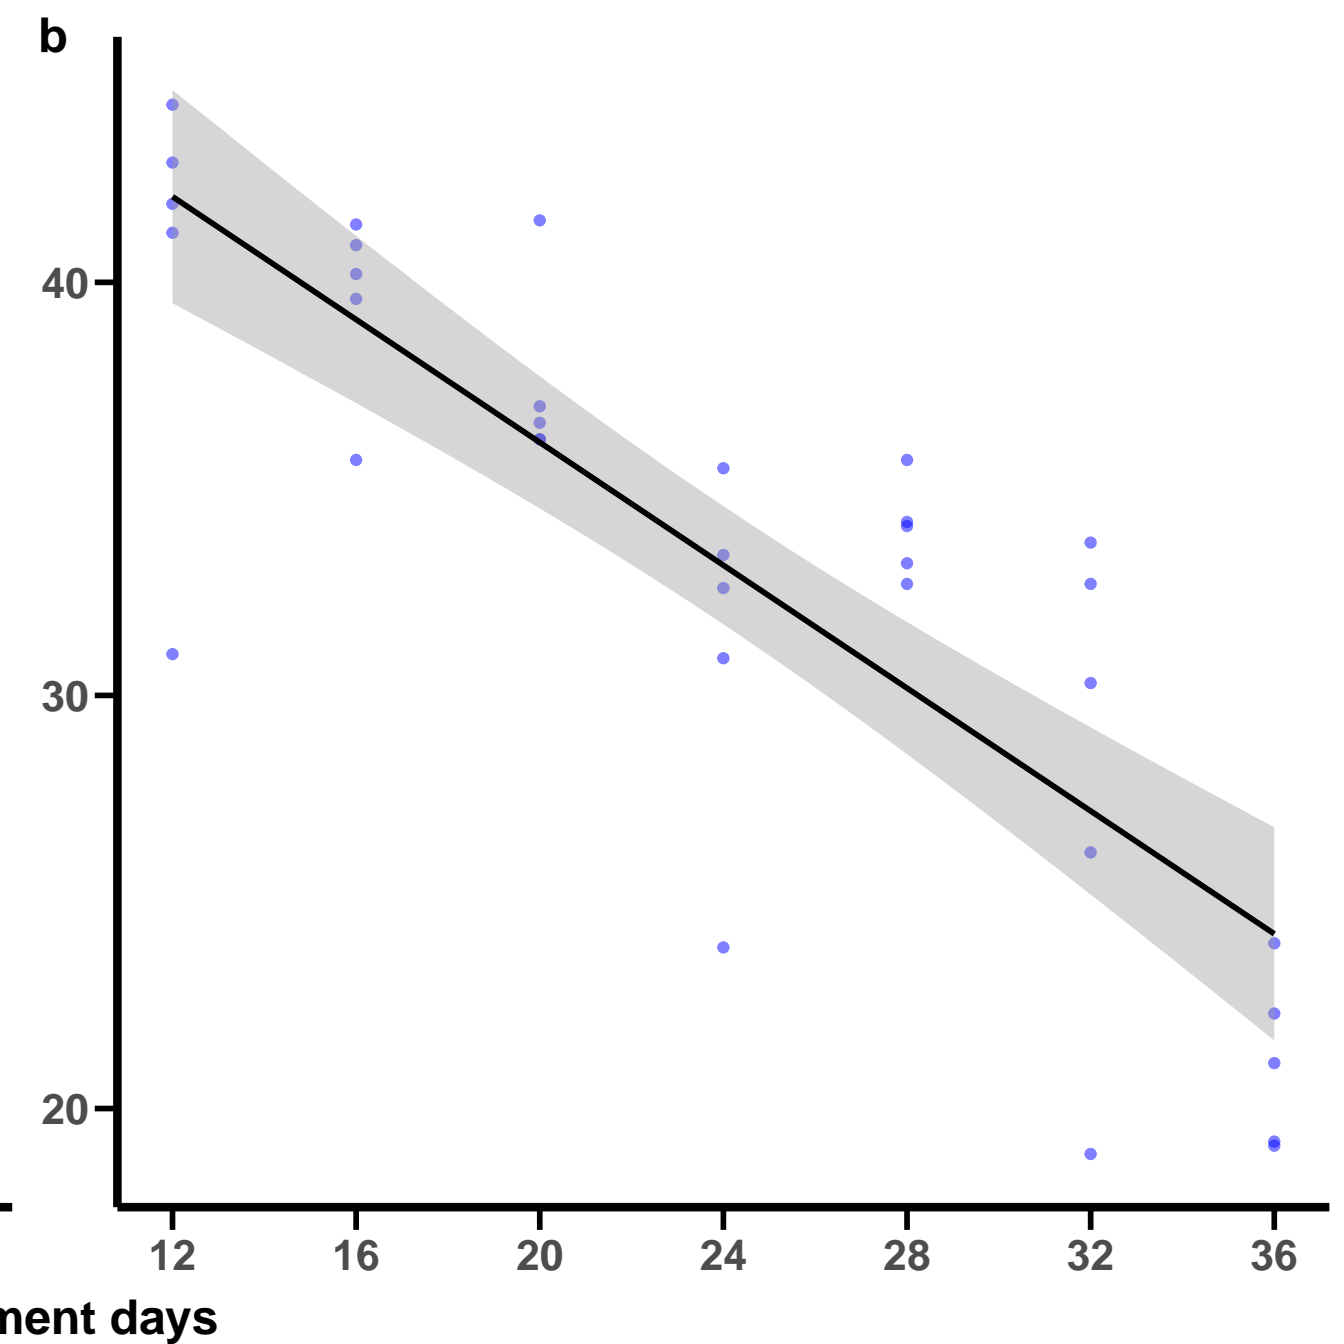

Supplement: Figure_S5.pdf [file Figure_S5.pdf]
